# Supplementary material for: Two mesoporous anionic metal–organic frameworks for selective and efficient adsorption of a cationic organic dye
Source: Royal Society of Chemistry journal article supplement (doi:10.1039/d1dt03131g), 2021-01-01
Supplement: d1dt03131g1.pdf [file d1dt03131g1.pdf]

## Supporting Information

# Two mesoporous anionic metal-organic frameworks for selective and efficient adsorption of cationic organic dye

Yu Gao,<sup>a#</sup> Yuzhu Li,<sup>a#</sup> Chen Liang,<sup>a</sup> Peipei Cen,<sup>\*b</sup> Jing Xi,<sup>a</sup> Yan Guo,<sup>\*a</sup> Weiming Song<sup>a</sup>  
and Xiangyu Liu<sup>\*ac</sup>

<sup>a</sup> State Key Laboratory of High-efficiency Utilization of Coal and Green Chemical Engineering, National Demonstration Center for Experimental Chemistry Education, College of Chemistry and Chemical Engineering, Ningxia University, Yinchuan 750021, China.

<sup>b</sup> College of Public Health and Management, Ningxia Medical University, Yinchuan 750021, China.

<sup>c</sup> State Key Laboratory of Coordination Chemistry, Nanjing University, Nanjing, 210023, China.

**Corresponding author:**

**Dr. Prof. Xiangyu Liu**

**E-mail: xiangyuliu432@126.com**

**Corresponding author:**

**Dr. Yan Guo**

**E-mail: 452785231@qq.com**

**Corresponding author:**

**Dr. Peipei Cen**

**E-mail: 13895400691@163.com**

## Contents

**Table S1.** Selected bond lengths (Å) and bond angles (°) for **1** and **2**.

**Table S2.** Molecular weight and dimensions of different dyes molecules.

**Fig. S1** The coordination modes of ITTC<sup>3-</sup> ligand in **1**.

**Fig. S2** The coordination modes of ITTC<sup>3-</sup> ligand in **2**.

**Fig. S3** Powdered X-ray diffraction (PXRD) patterns of **1-2**.

**Fig. S4** PXRD patterns of **1** and **2** after dye-releasing experiment, after re-usability experiment for MB adsorption, and after soaking in DMF solutions for 24h.

**Fig. S5** TG curves of **1-2**.

**Fig. S6** Infrared Spectra of H<sub>3</sub>ITTC(a), **1**(b) and **2**(c).

**Fig. S7** N<sub>2</sub> adsorption isotherms of **1**(a) and **2**(b).

**Fig. S8** MB adsorption isotherms of **1**(a) and **2**(b).

**Fig. S9** The dye-releasing process of MB@**1** in NaCl-saturated DMF solution(a) and in pure DMF(b).

**Fig. S10** The dye-releasing process of MB@**2** in NaCl-saturated DMF solution(a) and in pure DMF(b).

**Figure S11.** UV-vis spectra of five adsorption and desorption cycles of **1**(a) and **2**(b) for MB dye molecules.

**Table S1.** Selected bond lengths (Å) and bond angles (°) for **1-2**

| Compound 1                                                                                  |            |                         |            |
|---------------------------------------------------------------------------------------------|------------|-------------------------|------------|
| Zn(1)-O(3_2)                                                                                | 1.956(3)   | O(6_1)-Zn(1)O(2_1)#2    | 87.53(17)  |
| Zn(1)-O(6_1)                                                                                | 1.960(3)   | O(6_3)#1-Zn(1)-O(2_1)#2 | 147.18(19) |
| Zn(1)-O(6_2)#1                                                                              | 2.003(4)   | O(1_1)#2-Zn(1)-O(2_1)#2 | 57.3(2)    |
| Zn(1)-O(1_1)#2                                                                              | 2.077(5)   | O(3_2)-Zn(1)-C(1_1)#2   | 108.4(2)   |
| Zn(1)-O(2_1)#2                                                                              | 2.214(5)   | O(6_1)-Zn(1)-C(1_1)#2   | 106.3(2)   |
| Zn(1)-C(1_1)#2                                                                              | 2.492(6)   | O(6V3)#1-Zn(1)-C(1_1)#2 | 119.6(2)   |
| Zn(2)-O(4_2)                                                                                | 1.953(3)   | O(1_1)#2-Zn(1)-C(1_1)#2 | 27.8(2)    |
| Zn(2)-O(5_1)                                                                                | 1,953(3)   | O(2_1)-Zn(1)-C(1_1)#2   | 29.7(2)    |
| Zn(2)-O(1_2)#3                                                                              | 1.956(3)   | O(4_2)-Zn(2)-O(5_1)     | 129.61(15) |
| Zn(2)-O(5_3)#1                                                                              | 1,989(4)   | O(4_2)-Zn(2)-O(1_2)#3   | 107.86(13) |
| Zn(3)-O(4_1)#4                                                                              | 1.954(3)   | O(5_1)-Zn(2)-O(1_2)#3   | 112.67(15) |
| Zn(3)-O(6_2)#2                                                                              | 1.957(3)   | O(4_2)-Zn(2)-O(5_3)#1   | 100.14(14) |
| Zn(3)-O(2_3)#3                                                                              | 1.959(4)   | O(5_1)-Zn(2)-O(5_3)#1   | 101.46(15) |
| Zn(3)-O(3_3) #2                                                                             | 1,984(4)   | O(1_2)#3-Zn(2)-O(5_3)#1 | 99.39(15)  |
| O(3_2)-Zn(1)-O(6_1)                                                                         | 123.17(15) | O(4_1)#4-Zn(3)-O(6_2)   | 119.04(16) |
| O(32)-Zn(1)-O(63)#1                                                                         | 101.84(14) | O(4_1)#4-Zn(3)-O(2_3)   | 107.26(15) |
| O(61)-Zn(1)-O(63)#1                                                                         | 98.30(15)  | O(6_2)-Zn(3)-O(2_3)     | 115.72(15) |
| O(32)-Zn(1)-O(11)#2                                                                         | 105.93(17) | O(4_1)#4-Zn(3)-O(3_3)#2 | 93.10(15)  |
| O(61)-Zn(1)-O(11)#2                                                                         | 124.89(18) | O(6_2)-Zn(3)-O(3_3)#2   | 112.33(15) |
| O(63)#1-Zn(1)-O(11)#2                                                                       | 94.25(18)  | O(2_3)-Zn(3)-O(3_3)#2   | 106.63(17) |
| O(3_2)-Zn(1)-O(2_1)#2                                                                       | 101.73(19) | C(1_1)-O(1_1)-Zn(1)#3   | 96.3(5)    |
| #1 +x,+y,-1+z; #2 1+x,+y,+z; #3 -1+x,+y,+z; #4 1+x,1+y,1+z; #5 -1+x,-1+y,-1+z; #6 +x,+y,1+z |            |                         |            |
| Compound 2                                                                                  |            |                         |            |
| Cd(1)-O(2_1)                                                                                | 2.217(5)   | O(6_1)#1-Cd(1)-O(5_1)#1 | 54.88(17)  |
| Cd(1)-O(1_2)                                                                                | 2.294(8)   | O(4_1)#2-Cd(1)-O(5_1)#1 | 88.54(18)  |
| Cd(1)-O(6_1)#1                                                                              | 2.360(5)   | O(3_1)#2-Cd(1)-O(5_1)#1 | 88.70(17)  |
| Cd(1)-O(4_1)#2                                                                              | 2.394(6)   | O(2_1)-Cd(1)-O(2_2)     | 91.7(2)    |

|                         |          |                          |           |
|-------------------------|----------|--------------------------|-----------|
| Cd(1)-O(3_1)#2          | 2.398(6) | O(1_2)-Cd(1)-O(2_2)      | 51.7(2)   |
| Cd(1)-O(5_1)#1          | 2.446(4) | O(6_1)#1-Cd(1)-O(2_2)    | 81.2(2)   |
| Cd(1)-O(2_2)            | 2.507(7) | O(4_1)#2-Cd(1)-O(2_2)    | 172.5(2)  |
| O(2_1)-Cd(1)-O(1_2)     | 104.1(3) | O(3_1)#2-Cd(1)-O(2_2)    | 129.7(3)  |
| O(12)-Cd(1)-O(6_1)#1    | 88.0(2)  | O(5_1)#1-Cd(1)-O(2_2)    | 85.9(2)   |
| O(1_2)-Cd(1)-O(6_1)#1   | 131.0(2) | O(2_1)-Cd(1)-C(16_1)#2   | 104.5(2)  |
| O(2_1)-Cd(1)-O(4_1)#2   | 89.7(2)  | O(1_2)-Cd(1)-C(16_1)#2   | 108.8(3)  |
| O(1_2)-Cd(1)-O(4_1)#2   | 134.9(2) | O(4_1)#2-Cd(1)-C(16_1)#2 | 26.7(3)   |
| O(6_1)#1-Cd(1)-O(4_1)#2 | 91.5(2)  | O(5_1)#1-Cd(1)-C(16_1)#2 | 89.87(19) |
| O(2_1)-Cd(1)-O(3_1)#2   | 119.9(2) | O(2_2)-Cd(1)-C(16_1)#2   | 158.0(3)  |
| O(1_2)-Cd(1)-O(3_1)#2   | 81.5(2)  | O(2_1)-Cd(1)-C(24_1)#1   | 115.1(3)  |
| O(6_1)#1-Cd(1)-O(3_1)#2 | 132.8(2) | O(2_1)-Cd(1)-C(7_2)      | 99.5(3)   |
| O(4_1)#2-Cd(1)-O(3_1)#2 | 55.1(2)  | O(1_2)-Cd(1)-C(7_2)      | 26.1(2)   |
| O(2_1)-Cd(1)-O(5_1)#1   | 142.8(2) | O(3_1)#2-Cd(1)-C(7_2)    | 105.7(3)  |
| O(1_2)-Cd(1)-O(5_1)#1   | 103.2(2) | O(5_1)#1-Cd(1)-C(7_2)    | 94.1(3)   |

#1  $-1/2+x, 3/2-y, -1+z$ ; #2  $+x, +y, -1+z$ ; #3  $+x, +y, 1+z$ ; #4  $1/2+x, 3/2-y, 1+z$ ; #5  $1-x, +y, -z$

**Table S2.** Molecular weight and dimensions of different dyes molecules.

|                | 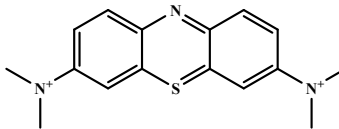 |  |  |
|----------------|-------------------------------------------------------------------------------------|-------------------------------------------------------------------------------------|---------------------------------------------------------------------------------------|
| Abbr.          | MB <sup>+</sup>                                                                     | SD <sup>0</sup>                                                                     | MO <sup>-</sup>                                                                       |
| M <sub>w</sub> | 284.40                                                                              | 248.28                                                                              | 304.33                                                                                |
| x(Å)           | 4.00                                                                                | 3.68                                                                                | 5.31                                                                                  |
| y(Å)           | 7.93                                                                                | 9.74                                                                                | 7.25                                                                                  |
| z(Å)           | 16.34                                                                               | 13.55                                                                               | 17.39                                                                                 |

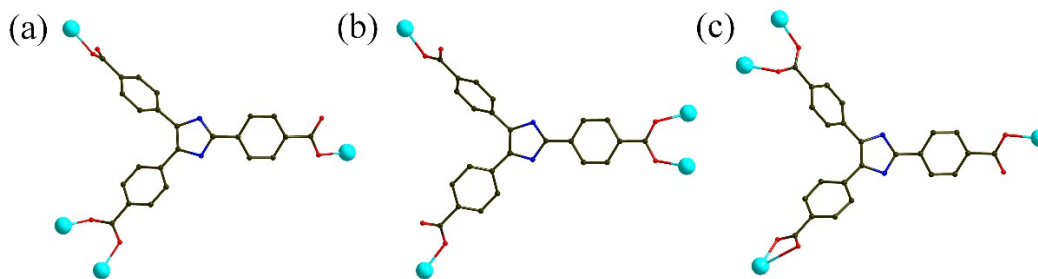

Fig. S1 The coordination modes of ITTC<sup>3-</sup> ligand in 1.

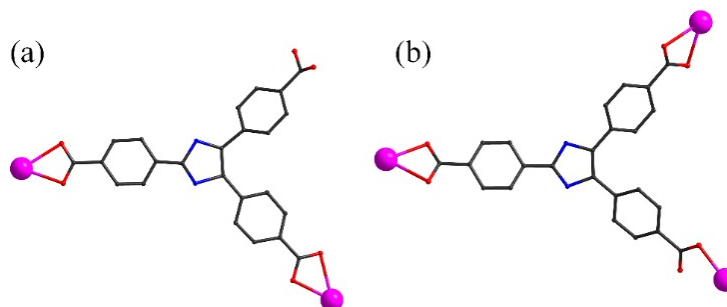

Fig. S2 The coordination modes of ITTC<sup>3-</sup> ligand in 2.

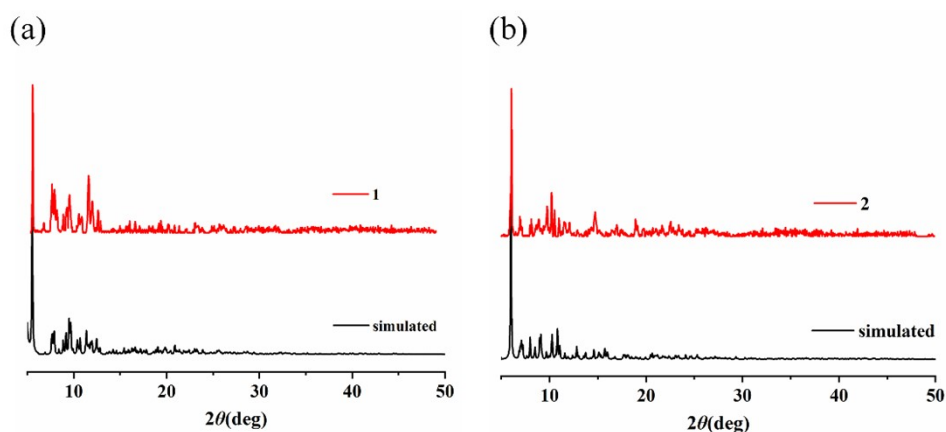

Fig. S3 Powdered X-ray diffraction (PXRD) patterns of 1-2.

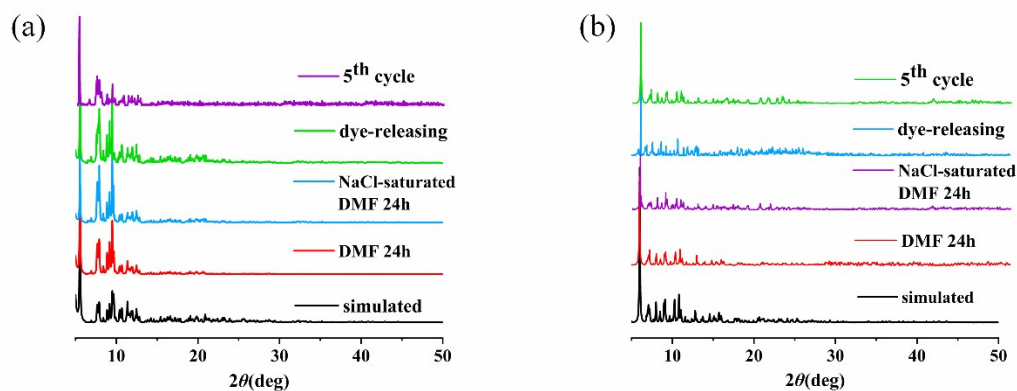

Fig. S4 PXRD patterns of 1(a) and 2(b) after soaking in DMF solutions for 24h, after soaking in NaCl-saturated DMF solution for 24h, after dye-releasing experiment, and after re-usability experiment for MB adsorption.

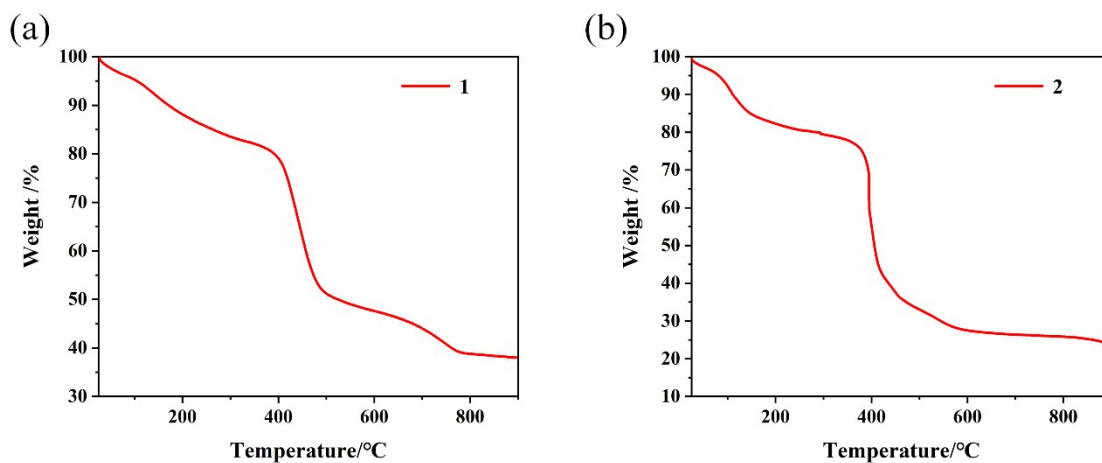

Fig. S5 TG curves of 1-2.

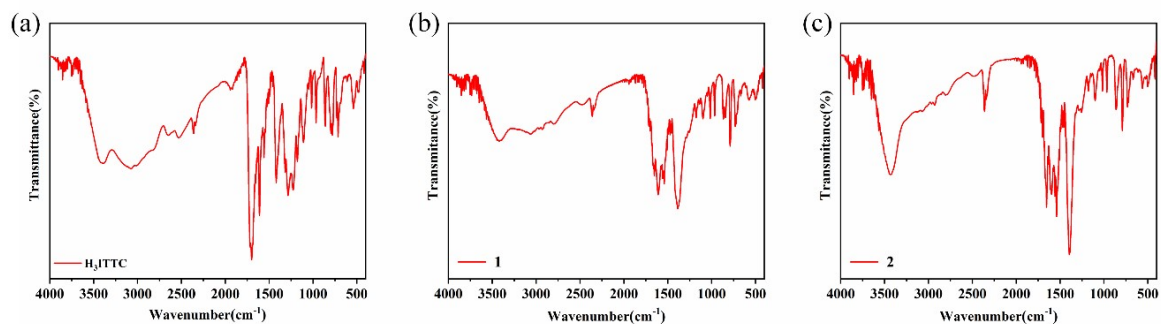

Fig. S6 Infrared Spectra of H<sub>3</sub>ITTC(a), 1(b) and 2(c).

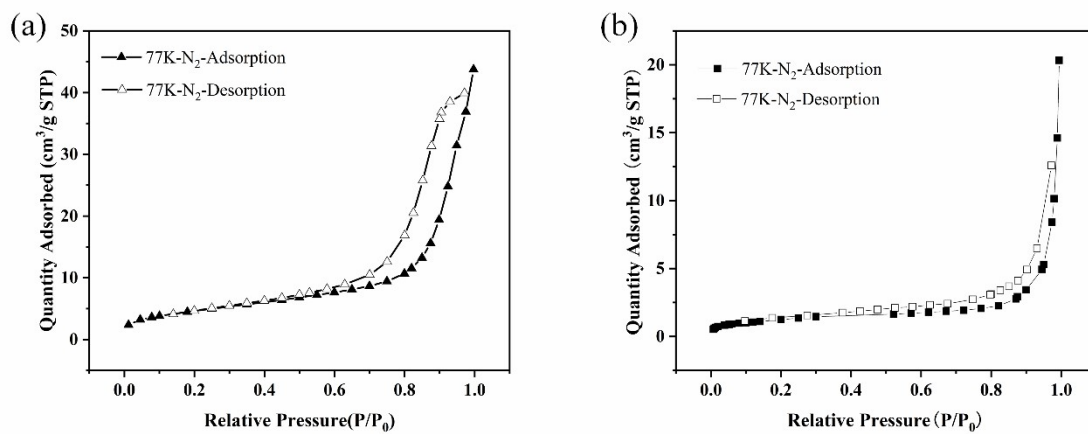

Fig. S7 N<sub>2</sub> adsorption isotherms of 1(a) and 2(b).

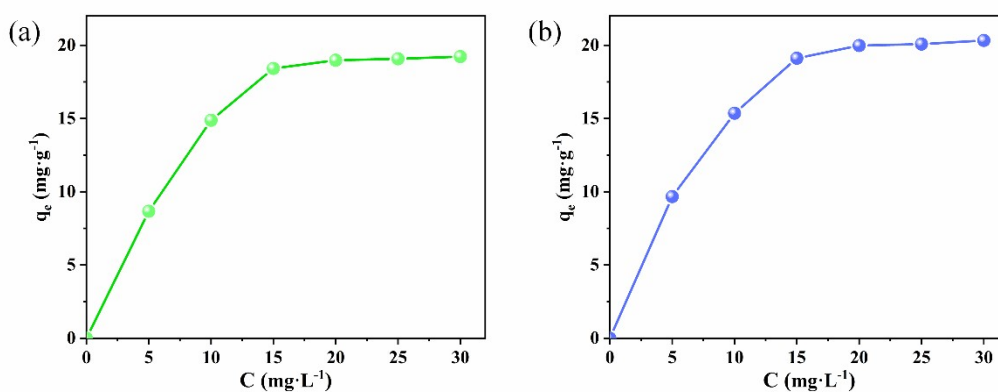

Fig. S8 MB adsorption isotherms of 1(a) and 2(b).

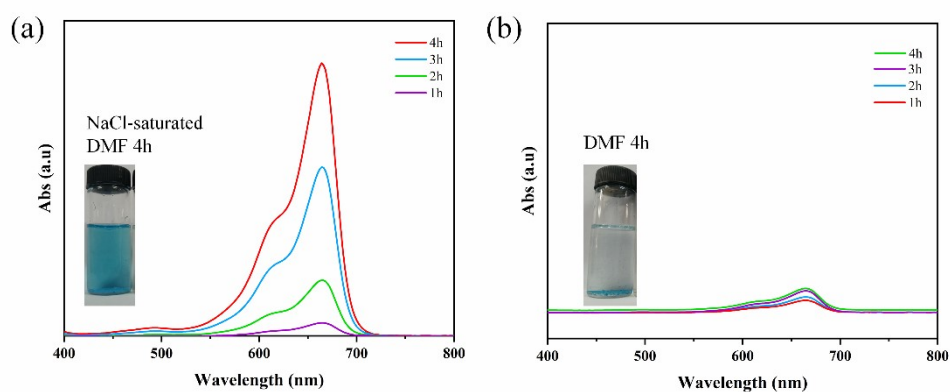

Fig. S9 The dye-releasing process of MB@1 in NaCl-saturated DMF solution(a) and in pure DMF(b).

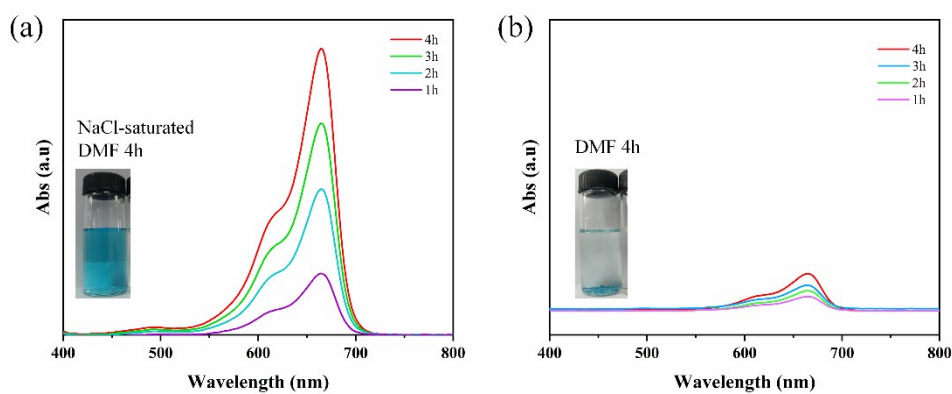

Fig. S10 The dye-releasing process of MB@2 in NaCl-saturated DMF solution(a) and in pure DMF(b).

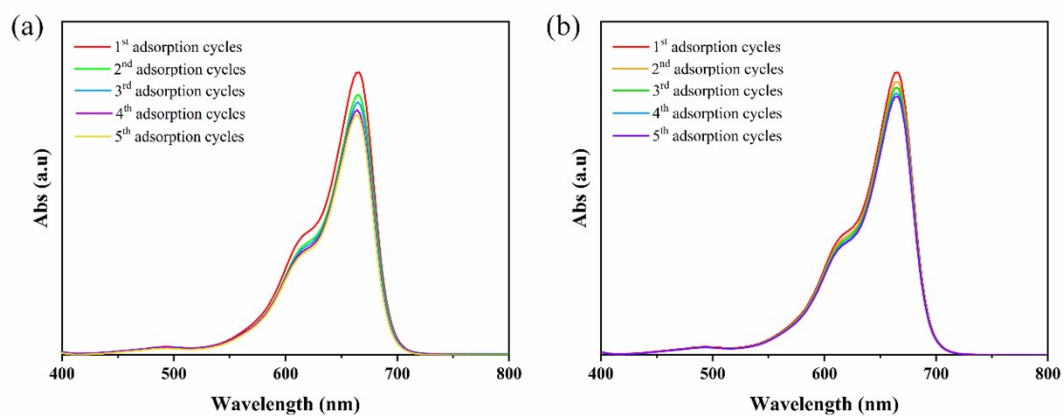

**Figure S11.** UV-vis spectra of five adsorption and desorption cycles of 1(a) and 2(b) for MB dye molecules.
